# Supplementary material
Source: PubMed Central journal article supplement (PMC4852131)
Supplement: NIHMS775316-supplement-supplementary_materials.pdf [file NIHMS775316-supplement-supplementary_materials.pdf]

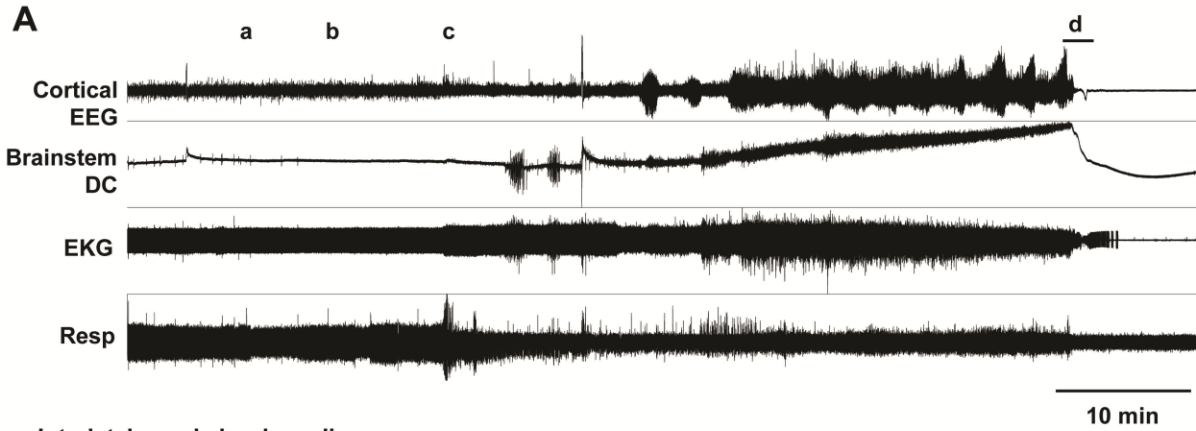

**a. Interictal apneic bradycardia**

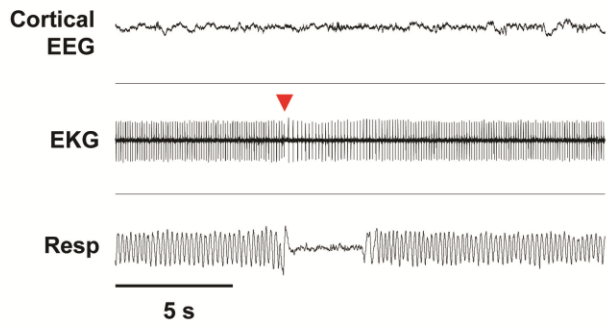

**b. Interictal bradycardia**

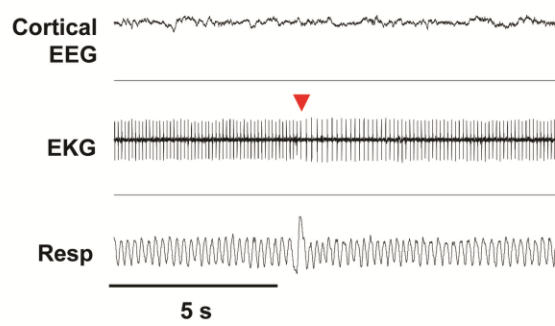

**c. Cortical spikes and onset of recurrent apnea, occasional bradycardia**

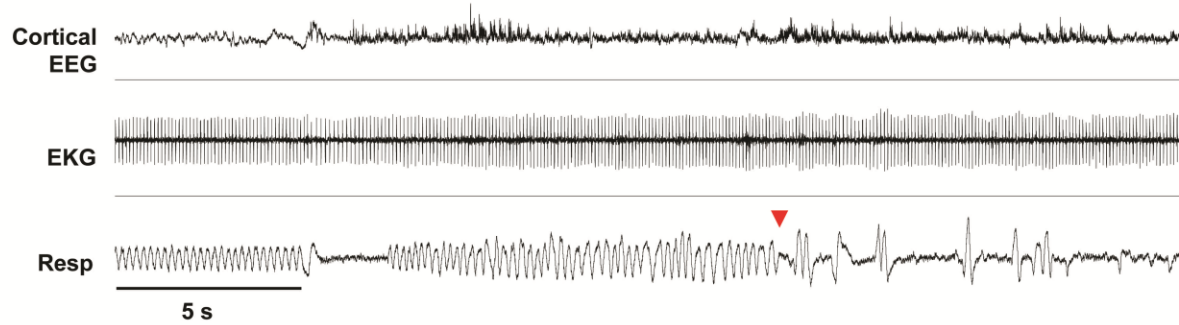

**d. Development of Brainstem DC potential shift and terminal cardiorespiratory responses**

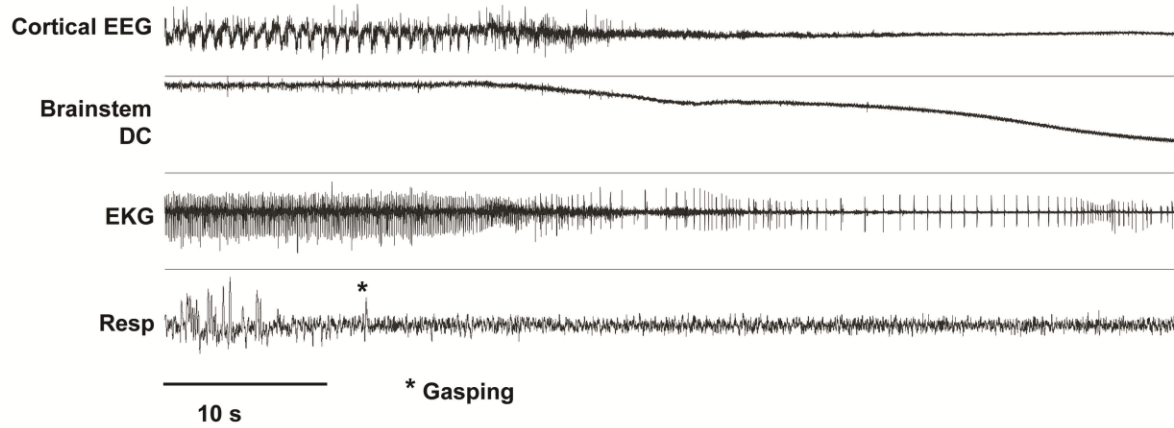

**Supplementary figure 1.** Seizure monitoring in Kv1.1 KO presented in **Fig. 1D** and **Fig. 3B**. Seizure terminates with brainstem SD and death. **A.** Recording of mouse shown in Fig. 1D with expanded traces shown in **a-d**. **a.** Bradycardia (red arrow) coincided with apnea. **b.** A brief bradycardia without apnea. **c.** Cortical spikes accompanied by apnea and bradycardia. Note poor recovery of respiratory tone following the second episode (red arrow). Irregular respiration pattern continued through subsequent cortical seizures and death (see **Fig. 1D**). **d.** expanded trace showing development of degenerative cardiorespiratory arrhythmias and initial appearance of negative DC potential shift in brainstem. Gasping is indicated by asterisk.

**A**

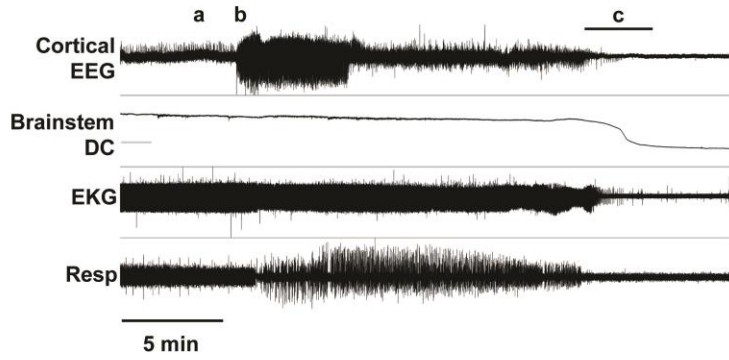

**a. Seizure onset without cardiorespiratory abnormality**

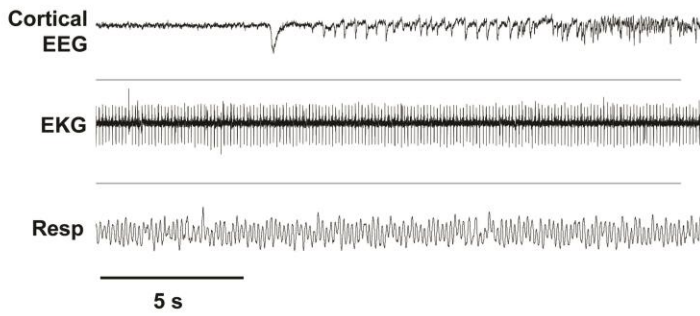

**b. Onset of agonal breathing without cardiac abnormality**

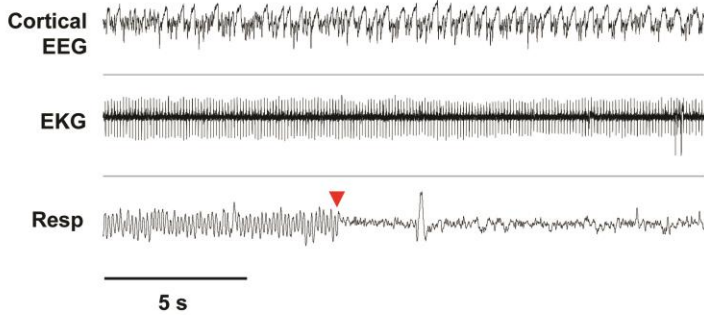

**c. Development of Brainstem DC potential shift and terminal cardiorespiratory responses**

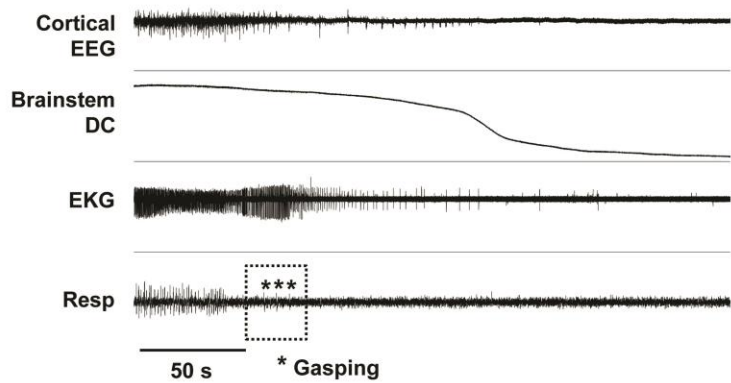

**Supplementary figure 2.** Seizure monitoring in second Kv1.1 KO presented in **Fig. 1E** and **Fig. 3C**. Brainstem SD and sudden death appeared >10 minutes following the termination of the last seizure. **A.** Recording of mouse shown in Fig. 1E with expanded traces shown in **a-c**. **a.** Cortical seizure did not disturb normal respiration in early phase. **b.** sudden onset of prolonged respiratory arrest and during seizure. Apnea and occasional large respiratory gasping continued (see **Fig 1E**). **c.** expanded trace showing development of degenerative cardiorespiratory arrhythmias and initial appearance of negative DC potential shift in brainstem. Gasping is indicated by asterisks and further expanded trace.

**Supplementary movie 1.** IOS in Kv1.1 KO brainstem slice showing wave (light, then dark) progressing from lateral border of NTS to engulf NTS and dorsal nucleus of vagus (X).

**Supplementary file 1.** Raw data.
